# Supplementary material for: One-Step Electrochemical Dealloying of 3D Bi-continuous Micro-nano Porous Bismuth Electrodes and CO<sub>2</sub>RR Performance
Source: Preprints.org preprint supplement (doi:10.20944/preprints202305.1116.v1), 2023-05-16
Supplement: Supplementary file 2 [file supplementary]

Supporting Information for:

**One-Step Electrochemical Dealloying of 3D bi-continuous Micro-nano Porous Bismuth Electrodes and CO2RR performance**

Wenqin Laia, Yating Liua, Mingming Zenga, Dongmei Hanab, Min Xiaoa, Shuanjin Wanga, Yuezhong Menga*, Shan Rena*

a The Key Laboratory of Low-Carbon Chemistry & Energy Conservation of Guangdong Province, State Key Laboratory of Optoelectronic Materials and Technologies, School of Materials Science and Engineering, Sun Yat-sen University, Guangzhou 510275, P. R. China.

b School of Chemical Engineering and Technology, Sun Yat-sen University, Zhuhai 519000, China

*Corresponding author.

Email-address: [stsrs@mail.sysu.edu.cn（S.R](mailto:stsrs@mail.sysu.edu.cn（S.R)）, [mengyzh@mail.sysu.edu.cn](mailto:mengyzh@mail.sysu.edu.cn)（Y.Z.M）

**
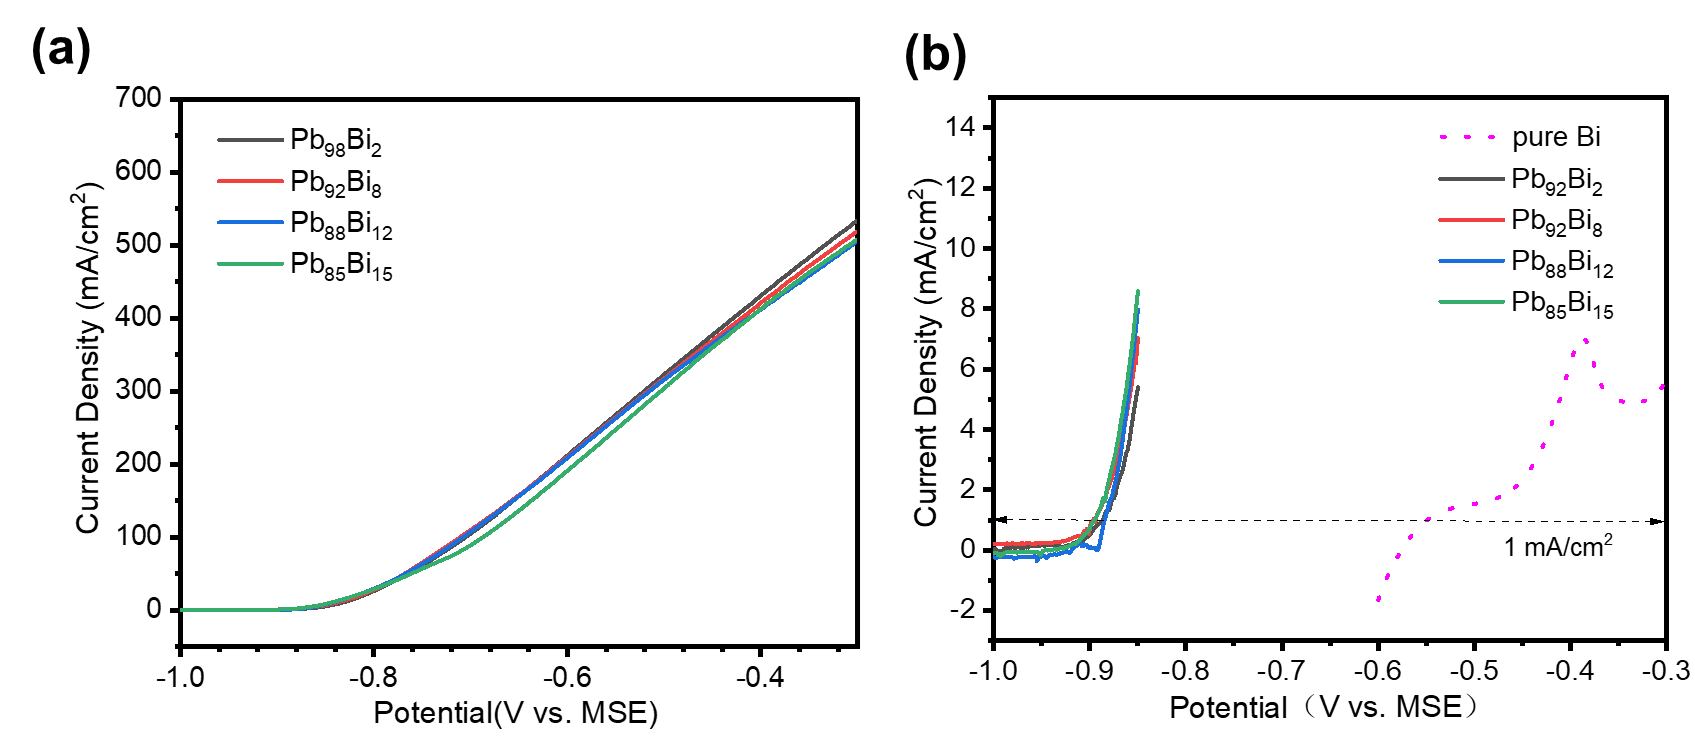
**

**Fig S1** (a)Linear sweep voltammetry curves of Pb98Bi2、Pb92Bi8、Pb88Bi12、Pb85Bi15 alloy in 0.5 M HNO3 aqueous solution at 25℃. The scan rate is 5.0 mV/s. (b) Comparison of details of Pb-Bi alloy and pure Bismuth sample in LSV curves.

**
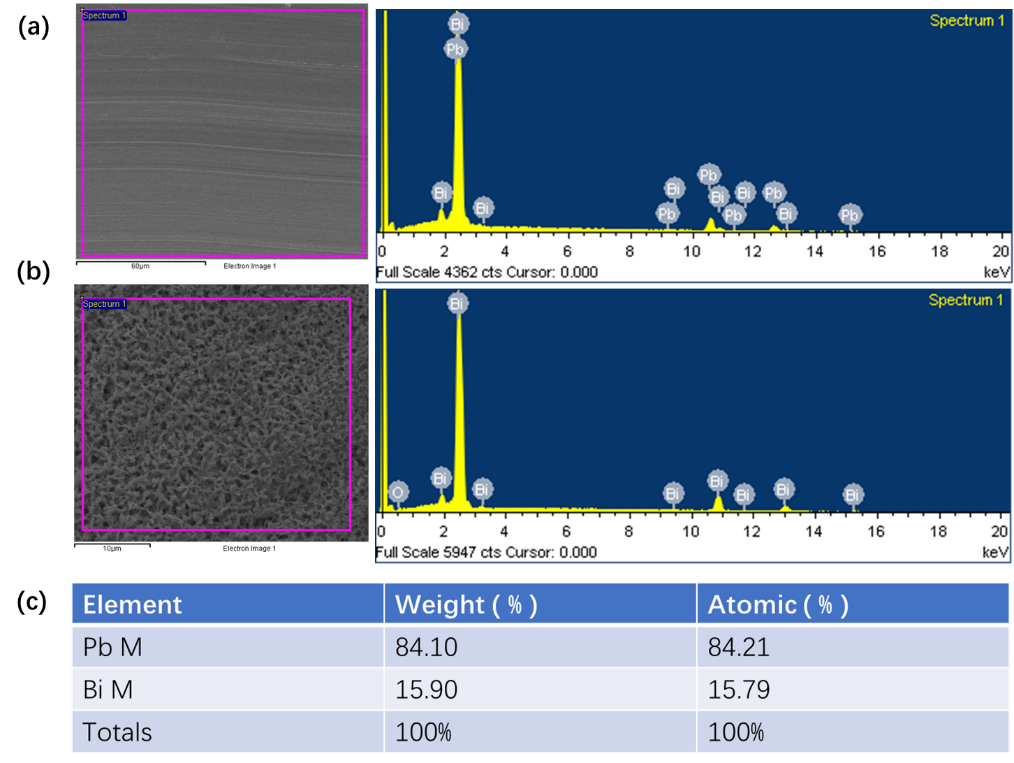
**

**Fig S2** EDS analyses of Pb98Bi15 alloy before (a) and after (b) and (c)element qualitative analysis. the potentiostatic dealloying with electric potential of -0.55 V vs. MSE in 0.5 M HNO3 aqueous solution at 10℃, 3600s.


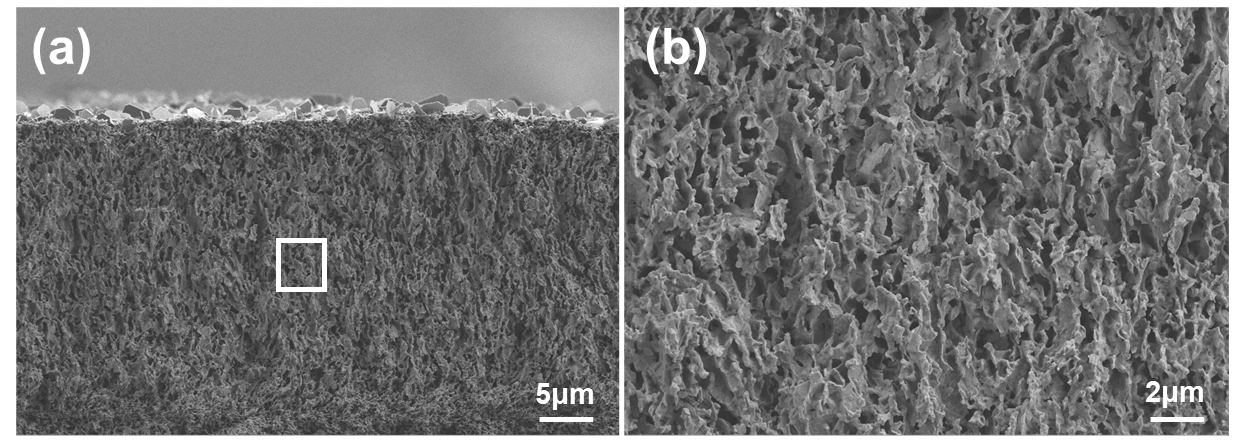


**Fig S3** (a,b)cross-section SEM images of np-Bi12 sample. dealloying with electric potential of -0.55 V vs. MSE in 0.5 M HNO3 aqueous solution at 10℃,1200s.

**
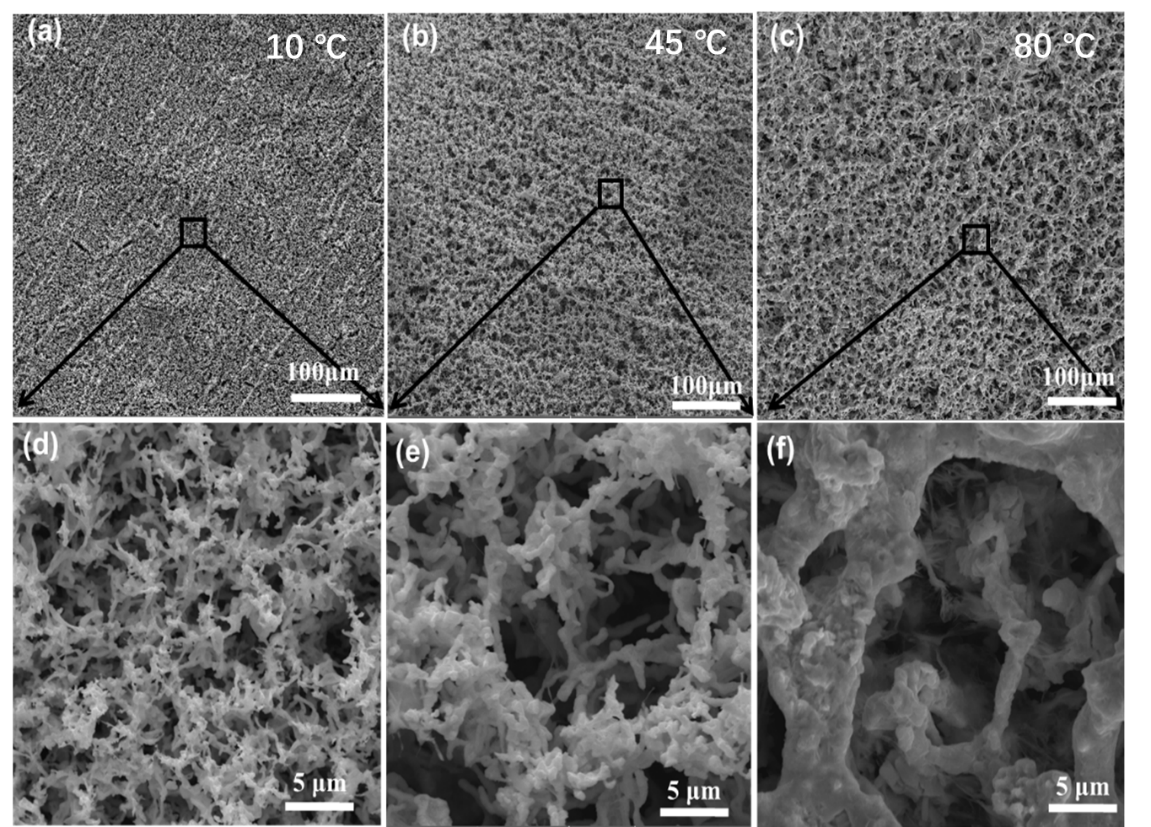
**

**Fig S4** Top-view SEM images of Pb98Bi2 alloy after the potentiostatic dealloying at 10℃ (a,d)、45℃ (b,e) and 80℃ (c,f).

**
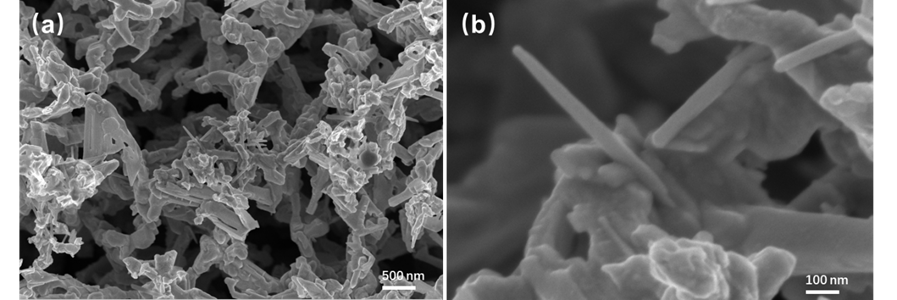
**

**Fig S5** High-resolution scanning electron micrograph of np-Bi2 sample.

**
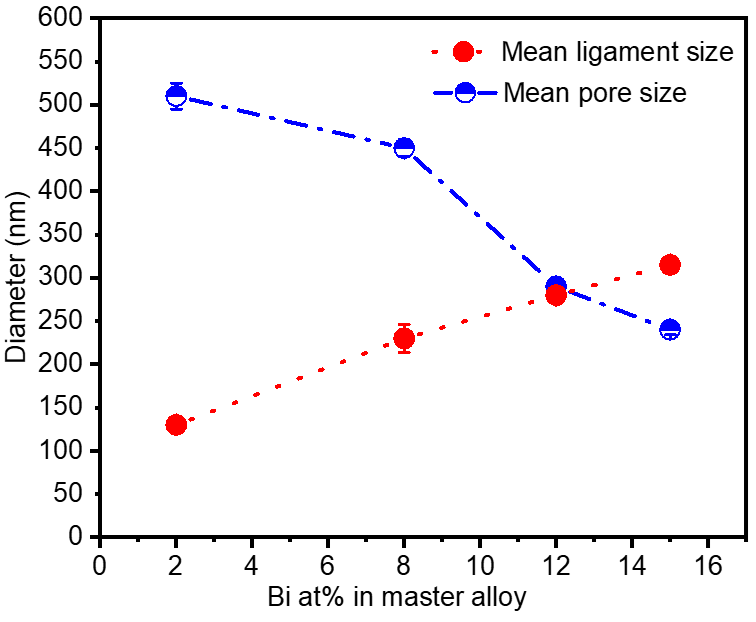
**

**Fig S6** Distribution diagram of the average pore size and ligament size of nano-porous Bi samples as a function of composition. Applied potential is -0.55 V vs. MSE. Electrolyte is 0.5 M HNO3 aqueous solution, dealloying temperature is 10℃.

**
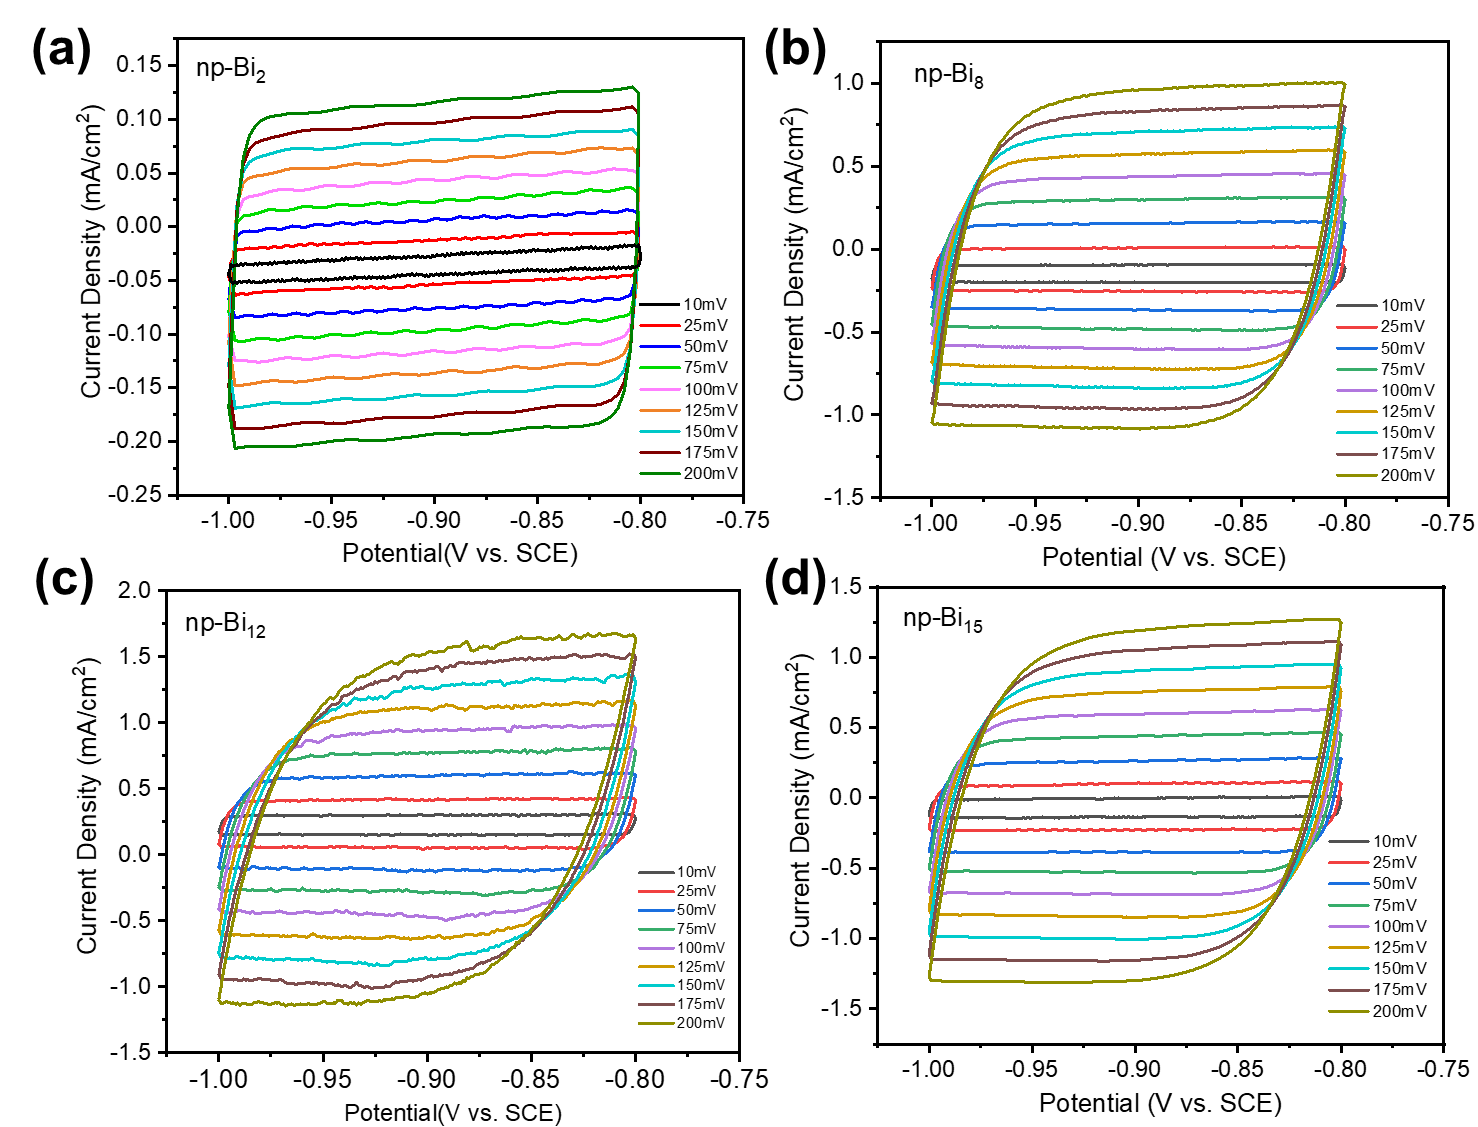
**

**Fig.S7** Cyclic voltammetry (CV) curves of （a）np-Bi2 , （b）np-Bi8，（c）np-Bi12,（d）np-Bi15 at different scanning speeds in a 0.1 M KHCO3 aqueous solution saturated with N2.

**
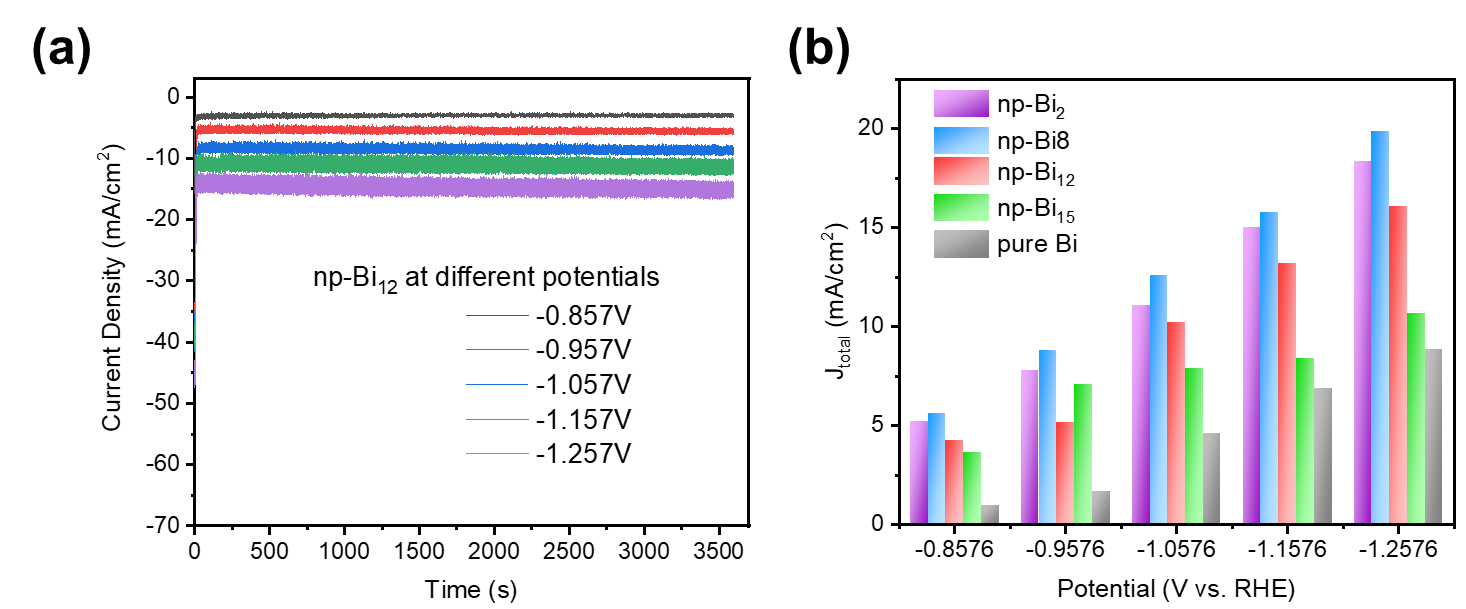
**

**Fig S8** (a) Time-dependent current density curves of np-Bi12 at different potentials. (b) The calculated total current density (Jtotal) values of four nanoporous electrodes under 1hour electrochemical catalysis.

**
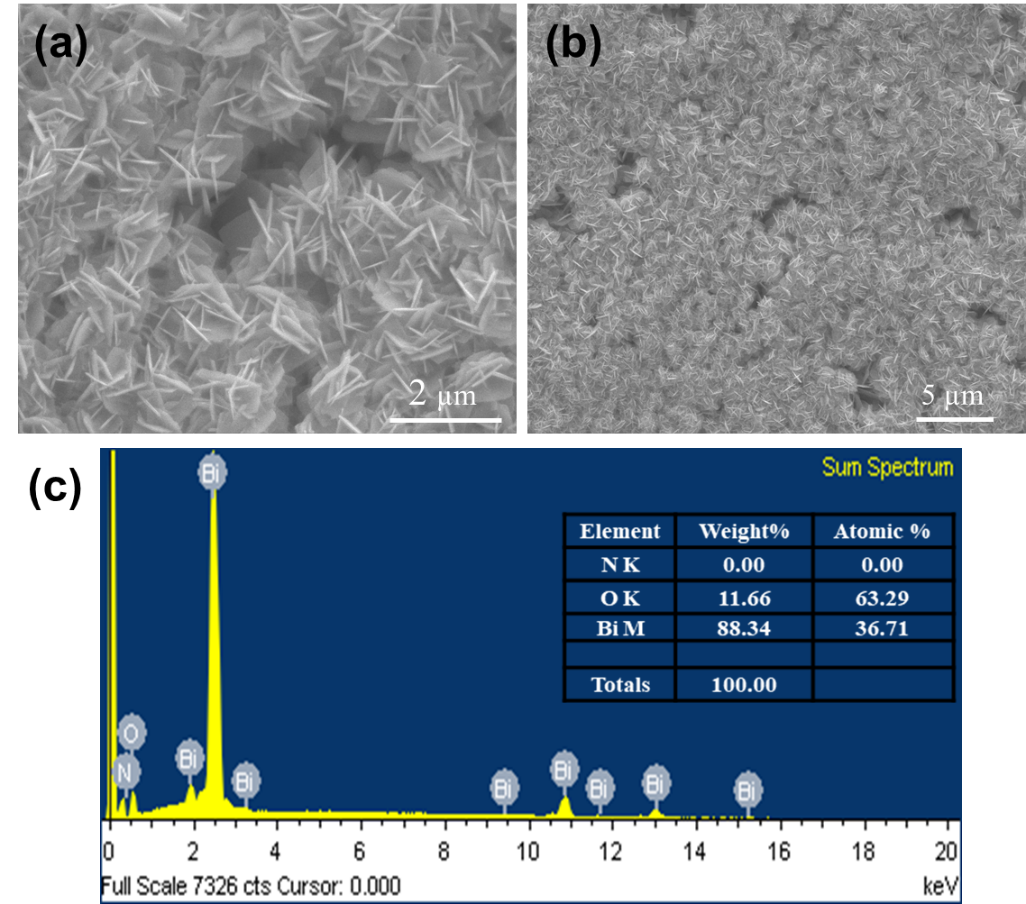
**

**Fig S9** Low (a) and high (b) magnification SEM images of np-Bi12 electrodes after 24h of long-term electrolysis test. (c) EDS analysis of the oxidized np-Bi12 electrodes.

**Table S1** The relationship between the size of four nanoporous Bi samples with different morphologies and the Faraday efficiency of formic acid.

| Sample Name | Mean pore size（nm） | Mean ligament size（nm） | FEHCOOH（%） |
| --- | --- | --- | --- |
| Bi2-10 | **510** | **130** | **76.7** |
| Bi8-10 | **450** | **230** | **74.5** |
| Bi12-10 | **290** | **280** | **92.2** |
| Bi15-10 | **240** | **315** | **88.8** |
